# Supplementary material for: Atrophy and Inflammatory Changes in Salivary Glands Induced by Oxidative Stress after Exposure to Drugs and Other Chemical Substances: A Systematic Review
Source: MDPI journal article supplement (doi:10.3390/medicina59091692), 2023-09-21
Supplement: s1 [file s1]

Supplemental file

Table S2. Details regarding sample size, histopathology staining techniques used in experimental case-control studies on different strains of animals to show oxidative stress histological and biomarkers changes induced by drugs on salivary glands

| <b>Autor<br/>Country<br/>Reference</b> | <b>Type of<br/>study<br/>Model<br/>considered</b>         | <b>Sample<br/>size<br/>(number,<br/>drug)</b>                   | <b>Dose and route of<br/>administration</b>                                                                                                                                                                                                                                                                                                                                                            | <b>Sacrificed</b>                                                                                                                                                                                                                                                                                                                                                 | <b>How were<br/>anti-oxidants<br/>introduced</b> | <b>Histo-<br/>pathology<br/>staining<br/>technique</b> | <b>Observation<br/>and<br/>limitations</b>                              |
|----------------------------------------|-----------------------------------------------------------|-----------------------------------------------------------------|--------------------------------------------------------------------------------------------------------------------------------------------------------------------------------------------------------------------------------------------------------------------------------------------------------------------------------------------------------------------------------------------------------|-------------------------------------------------------------------------------------------------------------------------------------------------------------------------------------------------------------------------------------------------------------------------------------------------------------------------------------------------------------------|--------------------------------------------------|--------------------------------------------------------|-------------------------------------------------------------------------|
| Mostafa et al. 2003<br>Egypt<br>[15]   | Experimental case-control study<br>Adult male albino rats | G1:10, control<br>G2: 10, HSP<br>G3: 10, CYP<br>G4: 10, CYP+HSP | G1: control: normal saline for seven days<br>G2: HSP (100 mg/kg body weight) daily orally for seven consecutive days<br>G3: CYP (200 mg/kg body weight) single intraperitoneal injection on the 7th day of the experiment<br>G4: HSP (100 mg/kg body weight) daily orally for seven consecutive days and CYP (200 mg/kg body weight) single intraperitoneal injection on the 7th day of the experiment | all animals were sacrificed; parotid glands were dissected and weighed. Then the tissues were distributed into two parts. The first one was homogenized and stored at – 80 °C for measuring of catalase activity, the levels of malondialdehyde (MDA) and glutathione peroxidase (GPx). The second part was prepared for histopathology and immunohistochemistry. | Pre-administration and coadministration          | HE<br>Mallory<br>$\alpha$ -SMA<br>ki-67                | Salivary gland observation only during administration with no follow-up |
| Alnuaimi et al., 2002<br>Iraq<br>[12]  | Experimental case-control study<br>Adult male albino rats | G1:6, control<br>G2: 6, Se<br>G3: 6, CYP<br>G4: 6, CYP+Se       | G1: control: normal saline orally using oral needle gavage for fourteen days<br>G2: 0.2 mg /kg b.w. /day) of selenium orally that diluted in normal saline for fourteen days via oral needle gavage<br>G3: 150 mg/kg of b.w.) of                                                                                                                                                                       | At the end of the experiment (15 <sup>th</sup> day), all rats in the four groups were anesthetized with an injection of ketamine and xylazine. Subsequently,                                                                                                                                                                                                      | Pre-administration and coadministration          | HE<br>Bcl-2<br>Positive and negative controls were     | No limitation identified                                                |

|                                                  |                                                           |                                                                |                                                                                                                                                                                                                                                                                                                                                                                                                                                    |                                                                                                 |                              |                                          |                          |
|--------------------------------------------------|-----------------------------------------------------------|----------------------------------------------------------------|----------------------------------------------------------------------------------------------------------------------------------------------------------------------------------------------------------------------------------------------------------------------------------------------------------------------------------------------------------------------------------------------------------------------------------------------------|-------------------------------------------------------------------------------------------------|------------------------------|------------------------------------------|--------------------------|
|                                                  |                                                           |                                                                | cyclophosphamide (diluted in normal saline) injected intraperitoneally (i.p) on the 8th day.<br>G4: (0.2 mg /kg b.w. /day) of selenium orally for fourteen days, as well as, a single dose of (150mg/kg of b.w.) of cyclophosphamide diluted in normal saline were given on the day 8th of an experiment                                                                                                                                           | submandibular salivary glands (SMG) were excised for histology and immunohistochemistry.        |                              | run simultaneously with biopsy specimen, |                          |
| <b>Abdelzaheer et al., 2002</b><br>Egypt<br>[16] | Experimental case-control study<br>Male albino rats       | G1: 8, control<br>G2: 8, FEB<br>G3: 8 5-FU<br>G4: 8, FEB+ 5-FU | G1: 8 control group, was given only the vehicle for 14 days before receiving saline intravenous injections from the 10th to the 14th day.<br>G2: 8 FEB (10 mg/kg) [18] once daily po for 14 days, dissolved in 0.5% carboxymethylcellulose sodium (CMC)<br>G3: 8 5-FU (35 mg/kg/day) i.p from the 10th to 14th day<br>G4: 8 pre-treated with 10 mg/kg FEB orally for two weeks before receiving 5-FU administration from the 10th to the 14th day. | For histological and immunohistochemical tests, one gland from one side of each rat was excised | Pre-administration           | HE<br>Toluidine-Blue<br>$\alpha$ -SMA    | No limitation identified |
| Elhindawy et al., 2019<br>Egypt<br>[18]          | Experimental case-control study<br>Adult male albino rats | G1:4, control<br>G2: 6, Tramadol<br>G3: 6, Tramadol withdrawal | G1: control 4 rats, received distilled water via gastric tube daily, one rat was sacrificed with each scarification period of other groups.<br>G2: Tramadol group. 6 rats, received 40 mg/kg 13 via gastric tube daily and were divided as follow:                                                                                                                                                                                                 | 20 days<br>30 days                                                                              | Withdrawal<br>No antioxidant | H&E<br>Toluidine blue<br>capase-3        | No limitation identified |

|                                       |                                                                                  |                              |                                                                                                                                                                                                                                                                                                                                                                                                                                                                                            |                                                                                                                                                                                                            |                |    |                                                                                                                                                                                                                                       |
|---------------------------------------|----------------------------------------------------------------------------------|------------------------------|--------------------------------------------------------------------------------------------------------------------------------------------------------------------------------------------------------------------------------------------------------------------------------------------------------------------------------------------------------------------------------------------------------------------------------------------------------------------------------------------|------------------------------------------------------------------------------------------------------------------------------------------------------------------------------------------------------------|----------------|----|---------------------------------------------------------------------------------------------------------------------------------------------------------------------------------------------------------------------------------------|
|                                       |                                                                                  |                              | <p>a) 3 rats received the drug for 20 days and then sacrificed.</p> <p>b) 3 rats received the drug for 30 days and then sacrificed.</p> <p>G3: Tramadol withdrawal group.</p> <p>6 rats, received 40 mg\kg 13 via gastric tube daily for 30 days and were divided as follow:</p> <p>a) 3 rats received distilled water for 20 days after tramadol withdrawal and then sacrificed.</p> <p>b) 3 rats received distilled water for 30 days after tramadol withdrawal and then sacrificed.</p> |                                                                                                                                                                                                            |                |    |                                                                                                                                                                                                                                       |
| Onopiuk et al., 2018<br>Poland<br>[5] | Experimental case-control study<br>14-month old male Wistar (CrI: WI (Han)) rats | G1: 8, control<br>G2: 8, MTZ | <p>G1: control: Rats received drinking water intragastrically once a day in a volume of 0.5mL in the same time regimes as in the MTZ group. for 7 days</p> <p>G2: MTZ: Rats received metronidazole intragastrically (tablets containing 250mg of active substance, Polpharma) once a day at a dose of 100 mg/kg body weight in a volume of 0.5mL of drinking water for 7 days</p>                                                                                                          | At the end of the experiment, 64 salivary glands, including 32 submandibular and 32 parotid (16 in each group), were collected from rats under anesthesia with ketamine (80 mg/kg) and xylazine (5 mg/kg). | NO antioxidant | No | The limitations during this project was the budget intended for the research. That conditioned the number of study groups and laboratory work. Furthermore, the main limitation of the study was limited publications in this subject |

|                             |                           |                        |                                                           |                                                                |                  |          |                                                                                                                                                                                                                                                                                                                                           |
|-----------------------------|---------------------------|------------------------|-----------------------------------------------------------|----------------------------------------------------------------|------------------|----------|-------------------------------------------------------------------------------------------------------------------------------------------------------------------------------------------------------------------------------------------------------------------------------------------------------------------------------------------|
|                             |                           |                        |                                                           |                                                                |                  |          | that have similar animal model. Also, the research was executed on older rats. In addition, the study could be conducted only in an animal model. Therefore, this mechanism in the human body is not entirely clear and requires further research. In the future, more xenobiotics will be studied and its influence on oxidative stress. |
| Hassabou et al., 2021 Egypt | Experimental case-control | G1: 10, normal control | G1: normal control were fed plain chow, received no drugs | At the end of the experiment, all the rats were scarified then | coadministration | HEPAS of | The present study aimed mainly to                                                                                                                                                                                                                                                                                                         |

|      |                              |                                                                                                    |                                                                                                                                                                                                                                                                                                                                           |                                                                                                                                                |  |               |                                                                                                                                                                                                                                                                                                                                                                                                                                                                    |
|------|------------------------------|----------------------------------------------------------------------------------------------------|-------------------------------------------------------------------------------------------------------------------------------------------------------------------------------------------------------------------------------------------------------------------------------------------------------------------------------------------|------------------------------------------------------------------------------------------------------------------------------------------------|--|---------------|--------------------------------------------------------------------------------------------------------------------------------------------------------------------------------------------------------------------------------------------------------------------------------------------------------------------------------------------------------------------------------------------------------------------------------------------------------------------|
| [19] | study<br>Male albino<br>rats | (NC)<br>group.<br>G2: 10,<br>tramadol<br>G 3: 10, 10-<br>DHGD,<br>G4: 10,<br>tramadol +<br>10-DHGD | G2: tramadol intra peritoneal<br>(20 mg /kg) body weight daily<br>for 45 days. G3: received freshly<br>extracted 10-DHGD, orally in a<br>dose level (10 mg /kg) body<br>weight and using 2% gum<br>acacia as suspending agent for<br>45 days.<br>G4: received tramadol and 10-<br>DHGD in combination using<br>the above-mentioned doses. | dissected,<br>submandibular salivary<br>glands (SMGs) tissues<br>were removed instantly,<br>rinsed with ice cooled<br>normal saline and dried. |  | caspase-<br>3 | focus on<br>histological<br>alterations<br>and apoptosis<br>only of SMGs<br>and dorsal<br>tongue of<br>experimental<br>rats due to<br>persistent<br>tramadol<br>intake.<br>Despite the<br>success<br>demonstrated<br>, there may be<br>certain<br>limitation in<br>using extra<br>parameters in<br>concern to<br>explain our<br>proposal,<br>however this<br>will be taken<br>in<br>consideration<br>during<br>planning of<br>further<br>studies in the<br>future. |
|------|------------------------------|----------------------------------------------------------------------------------------------------|-------------------------------------------------------------------------------------------------------------------------------------------------------------------------------------------------------------------------------------------------------------------------------------------------------------------------------------------|------------------------------------------------------------------------------------------------------------------------------------------------|--|---------------|--------------------------------------------------------------------------------------------------------------------------------------------------------------------------------------------------------------------------------------------------------------------------------------------------------------------------------------------------------------------------------------------------------------------------------------------------------------------|

\*HSP: hesperidin, CYP: Cyclophosphamide, Se: selenium, FEB: febuxostat, 5-FU: 5-fluorouracil, MTZ: metronidazole, PAS: Periodic acid-Schiff

Table S3. Details regarding sample size, histopathology staining techniques used in experimental case-control studies on different strains of animals after ethanol exposure to show oxidative stress histological and biomarkers changes induced on salivary glands

| <b>Autor<br/>Country<br/>Reference</b>  | <b>Type of<br/>study<br/>Model<br/>considered</b>                  | <b>Sample<br/>size<br/>(number,<br/>drug)</b> | <b>Dose and route of<br/>administration</b>                                                                                                                                                                                                                                                                                                                                                                                                                                                                                                                                                                               | <b>Sacri-<br/>ficed</b> | <b>How were<br/>anti<br/>oxidants<br/>introduced</b> | <b>Different groups<br/>considered or<br/>biopsied</b>                                                                                                                                                                                                                         | <b>Histo-<br/>pathology<br/>staining<br/>technique</b> | <b>Observation<br/>and<br/>limitations</b>                                                                                                                                                                                                                                                           |
|-----------------------------------------|--------------------------------------------------------------------|-----------------------------------------------|---------------------------------------------------------------------------------------------------------------------------------------------------------------------------------------------------------------------------------------------------------------------------------------------------------------------------------------------------------------------------------------------------------------------------------------------------------------------------------------------------------------------------------------------------------------------------------------------------------------------------|-------------------------|------------------------------------------------------|--------------------------------------------------------------------------------------------------------------------------------------------------------------------------------------------------------------------------------------------------------------------------------|--------------------------------------------------------|------------------------------------------------------------------------------------------------------------------------------------------------------------------------------------------------------------------------------------------------------------------------------------------------------|
| Ferreira et al., 2021<br>Brazil<br>[20] | Experimental case-control study<br>Rattus Novergicus, 60 days old, | G1: 4, control<br>G2: 4, EtOH group           | Pregnant dams were randomly divided into two groups (simple randomization), control and EtOH group (n = 4, each). Both groups were treated in gestational days GD6, GD7, GD8, with distilled water (control) or EtOH 3.0 g/kg (20 % w/vol) through intragastric gavage. After treatment periods, dams were kept under standard living conditions in single cages and have been weighted on GD13 and GD18. Two checkups after GD18 were performed daily for parturition verification. Day of birth was determined as postnatal day zero (PD0). Offspring groups were assigned at PD7. At PD20 males and females' pups were | -                       | No                                                   | Left side salivary glands (Parotid gland and Submandibular gland) were assigned for some analyses (Lipid peroxidation, Nox metabolites evaluation by Griess reagent assay, and Antioxidant Capacity against Peroxils Radicals – ACAP). Right side salivary glands (PG and SMG) | HE<br>CK-19<br>vimentin                                | The objective of pilocarpine was to stimulate salivary secretion in both groups at same condition. Pilocarpine is commonly used for cases of xerostomia due to its effects on muscarinic M3 receptors and it was used due to spontaneous saliva collection limitations regarding amount of collected |

|                                   |                                                                                  |                                                                      |                                                                                                                                                                                                                                                                                                                                                                                                                                                                                                     |   |                |                                                                                                                                                                                                                            |                             |                          |
|-----------------------------------|----------------------------------------------------------------------------------|----------------------------------------------------------------------|-----------------------------------------------------------------------------------------------------------------------------------------------------------------------------------------------------------------------------------------------------------------------------------------------------------------------------------------------------------------------------------------------------------------------------------------------------------------------------------------------------|---|----------------|----------------------------------------------------------------------------------------------------------------------------------------------------------------------------------------------------------------------------|-----------------------------|--------------------------|
|                                   |                                                                                  |                                                                      | weaned separated in different cages respecting treatment groups and weighted weekly until PD40.                                                                                                                                                                                                                                                                                                                                                                                                     |   |                |                                                                                                                                                                                                                            |                             | saliva [20].             |
| Fagundes et al., 2016 Brazil [7]  | Experimental case-control study<br>Female<br>Wistar rats, 35 days old            | G1: 5, control<br>G2: 5, control<br>G3: 8, ethanol<br>G4: 8, ethanol | G1, G2 – control groups distilled water<br>G3, G4: one group, with 1 week of 3 days of exposure to ethanol/distilled water; and another group, with 4 weeks of 3 days of exposure to ethanol/distilled water. Each group was composed of a control group, where the animals received distilled water, and an ethanol group, where animals received EtOH. Twelve hours after treatment, animals were divided and submitted to collection of fresh glands or perfusion ( $n = 5-8$ animals per group, | - | No antioxidant | The gland of the right side was removed and used for oxidative stress analysis. The gland of the left side was removed after perfusion and used to immunohistochemistry and morphometric analysis. All glands were weighed | $\alpha$ -SMA, CK-18<br>VIM | No limitation identified |
| Fernandes et al., 2015 Brazil [6] | Experimental case-control study<br>adolescent female<br>Wistar rats, 35 days old | G1: 8, control<br>G2: 8, ethanol                                     | G1: control: distilled water ( $n=8$ )<br>G2: ethanol (6.5 g/kg/day, 22.5% w/v) ( $n=8$ ). Every day, rats were administered through orogastric                                                                                                                                                                                                                                                                                                                                                     | - | No antioxidant | After 7.5 hours of the last administration of alcohol, which is the period related to non-detectable amounts of ethanol in the blood (Livy et al., 2003),                                                                  | $\alpha$ -SMA, CK19<br>CAS  | No limitation identified |

|                                 |                                                                            |                                                                                    |                                                                                                                                                                                         |   |               |                                                                                                                                                                                                                                                                                                                                                                                                                                                                              |                   |                          |
|---------------------------------|----------------------------------------------------------------------------|------------------------------------------------------------------------------------|-----------------------------------------------------------------------------------------------------------------------------------------------------------------------------------------|---|---------------|------------------------------------------------------------------------------------------------------------------------------------------------------------------------------------------------------------------------------------------------------------------------------------------------------------------------------------------------------------------------------------------------------------------------------------------------------------------------------|-------------------|--------------------------|
|                                 |                                                                            |                                                                                    | cannula over a period of 55 days (i.e., until the 90th day of life)                                                                                                                     |   |               | <p>animals were anaesthetised with a mixture of ketamine hydrochloride (72 mg/kg, i.p.) and xylazine (9 mg/kg, i.p.) and then perfused with heparinized saline followed by paraformaldehyde 4%. The PG and SG were removed and weighed by analytical balance After weighing, glands were post-fixed in formalin solution (10%), and submitted to histological process by dehydration in increasing alcohol battery and xylene, and finally embedded in Paraplast® resin.</p> |                   |                          |
| Sorkina et al., 2022 Russia [9] | Experimental case-control study mature male albino rats of the Wistar line | G1: 60, control<br>G2: 20, ethyl alcohol 30 days<br>G3: 20, ethyl alcohol 120 days | G1 was the control group. The experimental groups of animals was injected with 6.9 g/kg/day of 20% ethyl alcohol solution through the oral cavity with a syringe. G2 was treated for 30 | - | No atioxidant | Then, large SMG and PG were collected and subjected to morphological and histochemical research methods. The body weight of the rats and salivary glands was measured at each                                                                                                                                                                                                                                                                                                | HE toluidine blue | No limitation identified |



|  |  |                                         |                                                                                      |  |  |                      |  |  |
|--|--|-----------------------------------------|--------------------------------------------------------------------------------------|--|--|----------------------|--|--|
|  |  | G4: 20,<br>ethyl<br>alcohol<br>180 days | days,<br>G3 was treated for 120<br>days (n ¼ 20),<br>G4 was treated for 180<br>days. |  |  | experimental period. |  |  |
|--|--|-----------------------------------------|--------------------------------------------------------------------------------------|--|--|----------------------|--|--|

\*  $\alpha$ -SMA: Anti- $\alpha$  muscle actin, CK-18: anticytokeratin-18, VIM: vimentin, CK19: cytokeratin 19, CAS:

Table S4. Details regarding sample size, histopathology staining techniques used in experimental case-control studies on different strains of animals to show oxidative stress histological and biomarkers changes induced by heavy metals on salivary glands

| Autor<br>Country<br>Referen<br>ce                        | Type of<br>study<br>Model<br>considere<br>d                  | Sample<br>size<br>(number,<br>drug)                | If any<br>controls<br>were<br>considered                                                                                              | Dose and<br>route of<br>administrat<br>ion                                                                                                                                                              | Sacrificed | How were<br>anti<br>oxidants<br>introduced | Different<br>groups<br>considered or<br>biopsied                                                                                                                                                                                   | Histopathol<br>ogy<br>staining<br>technique | Observation<br>and<br>limitations |
|----------------------------------------------------------|--------------------------------------------------------------|----------------------------------------------------|---------------------------------------------------------------------------------------------------------------------------------------|---------------------------------------------------------------------------------------------------------------------------------------------------------------------------------------------------------|------------|--------------------------------------------|------------------------------------------------------------------------------------------------------------------------------------------------------------------------------------------------------------------------------------|---------------------------------------------|-----------------------------------|
| Souza-<br>Monteir<br>o et al.,<br>2020<br>Brazil<br>[11] | Experime<br>ntal case-<br>control<br>Swiss<br>albino<br>mice | G1: 10,<br>control<br>G2: 10,<br>AlCl <sub>3</sub> | G1: control<br>group                                                                                                                  | G2: Al<br>chloride<br>(AlCl <sub>3</sub> )<br>(18.5<br>mg/kg)<br>with<br>distilled<br>water as<br>vehicle by<br>intragastric<br>gavage for<br>60 days.                                                  | -          | No<br>antioxidant                          | The salivary<br>glands<br>were removed<br>and conducted<br>to histological<br>procedures.<br>For this analysis,<br>we evaluated the<br>area of the<br>tissues and<br>their structures.                                             | HE                                          | No limitation<br>identified       |
| Souza-<br>Monteir<br>o et al.,<br>2022<br>Brazil<br>[21] | Experime<br>ntal case-<br>control<br>Male<br>Wistar<br>rats  | G1: 16,<br>control<br>G2: 16,<br>aluminu<br>m      | The control<br>group<br>received<br>only distilled<br>water<br>(H <sub>2</sub> O <sub>d</sub> )<br>following the<br>same<br>protocol. | The<br>aluminum<br>group<br>received 8.3<br>mg/kg/day<br>of AlCl <sub>3</sub><br>diluted in 8<br>mg/mL<br>distilled<br>water daily<br>for 60 days.<br>The<br>exposure<br>solution<br>was<br>administere | -          | No<br>antioxidant                          | the salivary<br>glands were<br>collected and<br>then stored at -<br>80 °C for further<br>biochemistry<br>and proteomic<br>assays. The<br>remaining eight<br>animals per<br>group were<br>perfused for<br>histological<br>analysis. | HE                                          | No limitation<br>identified       |

|                                             |                                                              |                                                                             |                                                                                                                                                                                                      |                                                                                                                                                                                                                                                                                |     |                   |                                                                                                                                                                                                                                                                                                                                                                                                                                                                                                     |                                                         |    |
|---------------------------------------------|--------------------------------------------------------------|-----------------------------------------------------------------------------|------------------------------------------------------------------------------------------------------------------------------------------------------------------------------------------------------|--------------------------------------------------------------------------------------------------------------------------------------------------------------------------------------------------------------------------------------------------------------------------------|-----|-------------------|-----------------------------------------------------------------------------------------------------------------------------------------------------------------------------------------------------------------------------------------------------------------------------------------------------------------------------------------------------------------------------------------------------------------------------------------------------------------------------------------------------|---------------------------------------------------------|----|
|                                             |                                                              |                                                                             |                                                                                                                                                                                                      | d by<br>intra gastric<br>gavage.                                                                                                                                                                                                                                               |     |                   |                                                                                                                                                                                                                                                                                                                                                                                                                                                                                                     |                                                         |    |
| Aragão<br>et al.,<br>2017<br>Brazil<br>[22] | Experi-<br>mental case-<br>control<br>Male<br>albino<br>rats | G1:20,<br>control<br>G2: 20,<br>mercury<br>chloride<br>(HgCl <sub>2</sub> ) | In the control<br>group (n =<br>20), only<br>distilled<br>water was<br>administered<br>in similar<br>volumes. All<br>animals were<br>submitted to<br>oral<br>intra gastric<br>gavage for 45<br>days. | The<br>intoxicated<br>group (n =<br>20)<br>received an<br>oral dose of<br>0.375<br>mg/kg/day<br>of mercury<br>chloride<br>(HgCl <sub>2</sub> ),<br>according<br>to the<br>protocol<br>previously<br>described<br>by Szasz et<br>al.13 and<br>Teixeira et<br>al.14., 45<br>days | yes | No<br>antioxidant | After the<br>intoxication<br>period, 10<br>animals from<br>each group were<br>perfused, with<br>the<br>collection of<br>submandibular<br>and parotid<br>glands, followed<br>by<br>salivary glands<br>weight<br>measurement on<br>analytical<br>balance (FA<br>2104N,<br>Bioprecisa<br>Electronic<br>Balance,<br>Shanghai,<br>China). After<br>this, these<br>glands were sent<br>to tissue<br>processing and<br>subsequent<br>morphometric<br>and<br>immunohistoche-<br>mical analysis.<br>The non- | anti-MT -<br>I/II<br>anti-<br>Cytokeratin<br>19 (CK-19) | No |

|                                        |                                                               |                                                                |                                                        |                                                                                            |                                                                                                                                                      |                |                                                                                                                                                                        |                          |                          |
|----------------------------------------|---------------------------------------------------------------|----------------------------------------------------------------|--------------------------------------------------------|--------------------------------------------------------------------------------------------|------------------------------------------------------------------------------------------------------------------------------------------------------|----------------|------------------------------------------------------------------------------------------------------------------------------------------------------------------------|--------------------------|--------------------------|
|                                        |                                                               |                                                                |                                                        |                                                                                            |                                                                                                                                                      |                | perfused animals were sacrificed, with collection of submandibular and parotid gland. These glands were submitted to cold-vapour atomic absorption (CVAA) spectroscopy |                          |                          |
| Farias-Junior et al., 2017 Brazil [25] | Experimental case-control<br>Male Wistar rats, 40 days of age | G1: 20, control<br>G2: 20, methylmercury (diluted in corn oil) | the other group received only corn oil, 35 days        | One group received methylmercury (diluted in corn oil) at a dose of 0.04 mg/kg/day 35 days | After 35 days of intoxication, the animals were submitted to cervical dislocation, with the dissection of parotid and submandibular salivary glands. | No antioxidant | -                                                                                                                                                                      | No histology             | No limitation identified |
| Lopes et al., 2020 Brazil [23]         | Experimental case-control<br>Male Wistar                      | G1: 20, control<br>G2: 20, Pb acetate                          | Animals in the control group (n = 20) received similar | Pb acetate (Sigma-Aldrich, Germany) was used                                               | After 55 days of exposure, 10 animals from each                                                                                                      | No antioxidant | The remaining 10 animals from each group were perfused, and their parotid                                                                                              | HE MT I/II $\alpha$ -SMA | No limitation identified |

|  |      |  |                                    |                                                                                                                                  |                                                                                                                                                                                                                                                                                                                |  |                                                                                                                        |  |  |
|--|------|--|------------------------------------|----------------------------------------------------------------------------------------------------------------------------------|----------------------------------------------------------------------------------------------------------------------------------------------------------------------------------------------------------------------------------------------------------------------------------------------------------------|--|------------------------------------------------------------------------------------------------------------------------|--|--|
|  | rats |  | volume of distilled water, 55 days | and administered to the animals of the exposed group (n = 20) by intragastric gavage at a concentration of 50 mg/kg/day, 55 days | group were euthanized, and their blood and salivary glands were collected. The salivary glands were washed in saline solution, frozen in liquid nitrogen, and stored at - 80 °C. Then, the samples were sonically homogenized in Tris-HCl buffer (20 mM, pH 7.4) until the approximate concentration of 1 g/mL |  | and submandibular glands were collected for histological procedures for morphometric and immunohistochemical analyses. |  |  |
|--|------|--|------------------------------------|----------------------------------------------------------------------------------------------------------------------------------|----------------------------------------------------------------------------------------------------------------------------------------------------------------------------------------------------------------------------------------------------------------------------------------------------------------|--|------------------------------------------------------------------------------------------------------------------------|--|--|

|                                    |                                                                   |                                                                                                           |                                                                                                                                        |                                                                                                                                                                                                                                                                                                           |                                       |                        |   |              |                          |
|------------------------------------|-------------------------------------------------------------------|-----------------------------------------------------------------------------------------------------------|----------------------------------------------------------------------------------------------------------------------------------------|-----------------------------------------------------------------------------------------------------------------------------------------------------------------------------------------------------------------------------------------------------------------------------------------------------------|---------------------------------------|------------------------|---|--------------|--------------------------|
|                                    |                                                                   |                                                                                                           |                                                                                                                                        |                                                                                                                                                                                                                                                                                                           | and proceed the biochemical analyses. |                        |   |              |                          |
| Dąbrowska et al., 2019 Poland [27] | Experimental case-control<br>96 young (3-4-weekold) female Wistar | G1: 16, control<br>G2: 16, AMPF<br>G3: 16, Cd1<br>G4: 16, Cd1 + AMPF<br>G5: 16, Cd5<br>G6: 16, Cd5 + AMPF | Group 1 – control: throughout the experiment (3 or 10 months), the rats received purified water and standard fodder (Labofeed, Kcynia) | Group 2 – AMPF: the rats received only a 0.1% water solution of extract of polyphenols (AMPF) for drinking for 3 or 10 months and standard fodder<br>Group 3 – Cd1: the rats were exposed to cadmium (as CdCl <sub>2</sub> ) in the fodder, receiving 1mg Cd/kg for 3 or 10 months, and received purified | -                                     | APMF Co-administration | - | No histology | No limitation identified |

|  |  |  |  |                                                                                                                                                                                                                                                                                                                                                                    |  |  |  |  |  |
|--|--|--|--|--------------------------------------------------------------------------------------------------------------------------------------------------------------------------------------------------------------------------------------------------------------------------------------------------------------------------------------------------------------------|--|--|--|--|--|
|  |  |  |  | <p>water for drinking</p> <p>Group 4—</p> <p>Cd1 +</p> <p>AMPF:</p> <p>throughout the period (3 or 10 months) of exposure to 1mg of Cd/kg, the rats received the 0.1% water solution of extract of polyphenols from black chokeberry fruit</p> <p>Group 5—</p> <p>Cd5: the rats received fodder containing 5mg Cd/kg for 3 or 10 months and purified water for</p> |  |  |  |  |  |
|--|--|--|--|--------------------------------------------------------------------------------------------------------------------------------------------------------------------------------------------------------------------------------------------------------------------------------------------------------------------------------------------------------------------|--|--|--|--|--|

|                                 |                                                 |                                               |   |                                                                                                                                                                                                     |                                                                                                                     |                      |   |              |                                                                                                                                                                  |
|---------------------------------|-------------------------------------------------|-----------------------------------------------|---|-----------------------------------------------------------------------------------------------------------------------------------------------------------------------------------------------------|---------------------------------------------------------------------------------------------------------------------|----------------------|---|--------------|------------------------------------------------------------------------------------------------------------------------------------------------------------------|
|                                 |                                                 |                                               |   | drinking Group 6— Cd5 + AMPF: during exposure (for 3 or 10 months) to 5mg Cd/kg of fodder, the rats received 0.1% water solution of extract of polyphenols from black chokeberry fruit for drinking |                                                                                                                     |                      |   |              |                                                                                                                                                                  |
| Onopiuk et al., 2021 Poland [2] | Experimental case-control 96 female Wistar rats | G1: 16, control<br>G2<br>G3<br>G4<br>G5<br>G6 | - | (control group and ChE group) or containing cadmium (Cd1 group, Cd5 group, Cd1 +ChE group, and Cd5+ChE group) and drinking                                                                          | After 3 and 10 months of the experiment, the right and left sublingual salivary glands were collected under general | ChE coadministration | - | No histology | The next limitation is the small weight of the sublingual salivary glands, which made it impossible to perform a wider range of studies, including determination |



|  |  |  |  |                                                                                                                                                                                                                |                                                                                                                                                                                                                                                                                                                            |  |  |  |                                                                                                                                                                                                                                                                                                                                                                                                                                             |
|--|--|--|--|----------------------------------------------------------------------------------------------------------------------------------------------------------------------------------------------------------------|----------------------------------------------------------------------------------------------------------------------------------------------------------------------------------------------------------------------------------------------------------------------------------------------------------------------------|--|--|--|---------------------------------------------------------------------------------------------------------------------------------------------------------------------------------------------------------------------------------------------------------------------------------------------------------------------------------------------------------------------------------------------------------------------------------------------|
|  |  |  |  | <p>fluid—unpolluted water (control group, Cd1 group, and Cd5 group) or 0.1% aqueous ChE (ChE group, Cd1+ChE group, and Cd5+ChE group). The 0.1% ChE was prepared from the powdered A. melanocarp a extract</p> | <p>anaesthesia with barbiturate (intraperitoneal administration of Morbital in a dose of 30 mg/kg b.w.), immediately after animals were sacrificed. For this purpose, the common sublingual and submandibular connective tissue capsule, covering both salivary glands, was removed, and the right and left sublingual</p> |  |  |  | <p>of indices of oxidative modifications of nucleic acids and evaluation of the microscopic structure of the salivary gland tissue. Another limitations of the study are the impossibility of explanation of the molecular pathways of the preventive action of ChE with respect to the oxidative stress and oxidative modifications of proteins and lipids induced by cadmium in the sublingual salivary gland, as well as whether the</p> |
|--|--|--|--|----------------------------------------------------------------------------------------------------------------------------------------------------------------------------------------------------------------|----------------------------------------------------------------------------------------------------------------------------------------------------------------------------------------------------------------------------------------------------------------------------------------------------------------------------|--|--|--|---------------------------------------------------------------------------------------------------------------------------------------------------------------------------------------------------------------------------------------------------------------------------------------------------------------------------------------------------------------------------------------------------------------------------------------------|

|  |  |  |  |  |                                                                                                                                            |  |  |  |                                                                                                                                                                                                                                                                                                                                                                                                                               |
|--|--|--|--|--|--------------------------------------------------------------------------------------------------------------------------------------------|--|--|--|-------------------------------------------------------------------------------------------------------------------------------------------------------------------------------------------------------------------------------------------------------------------------------------------------------------------------------------------------------------------------------------------------------------------------------|
|  |  |  |  |  | glands (the sublingual glands are paired salivary glands of the same structure and function) were separated from the submandibular glands. |  |  |  | changes in the balance between the processes of oxidation and reduction in this salivary gland noted due to the administration of cadmium or/ and ChE might be the outcome or the cause of the impact on the salivary glands' secretory function or saliva composition. In the available literature, we have found no data on the relationship between salivary glands' oxidative/reductive status and the saliva secreted by |
|--|--|--|--|--|--------------------------------------------------------------------------------------------------------------------------------------------|--|--|--|-------------------------------------------------------------------------------------------------------------------------------------------------------------------------------------------------------------------------------------------------------------------------------------------------------------------------------------------------------------------------------------------------------------------------------|

|                                          |                                                     |                                                                                                                                                                                          |                                                                    |                                                                                                                                                                                                                                                                                                                                                        |   |                     |   |              |                           |
|------------------------------------------|-----------------------------------------------------|------------------------------------------------------------------------------------------------------------------------------------------------------------------------------------------|--------------------------------------------------------------------|--------------------------------------------------------------------------------------------------------------------------------------------------------------------------------------------------------------------------------------------------------------------------------------------------------------------------------------------------------|---|---------------------|---|--------------|---------------------------|
|                                          |                                                     |                                                                                                                                                                                          |                                                                    |                                                                                                                                                                                                                                                                                                                                                        |   |                     |   |              | them.                     |
| Kostecka-Sochoń et al., 2018 Poland [26] | Experimental case-control 72 adult male Wistar rats | 9 groups, and in each group was 8 animals. In research, 2 groups received Zn alone, 2 groups were treated with Cd alone, and 4 groups received Zn supplementation during exposure to Cd. | The control group received drinking water without cadmium or zinc. | Zn and Cd were administered in drinking water at the concentrations of 30 or 60mg Zn/L (as ZnCl <sub>2</sub> ; Merck) and 5 or 50mg Cd/L (as CdCl <sub>2</sub> ·2 1/2H <sub>2</sub> O; POCH; Gliwice, Poland) alone (30mg Zn/L, 60mg Zn/L, 5mg Cd/L, and 50mg Cd/L groups) and in combination (5mg Cd/L + 30mg Zn/L, 5mg Cd/L + 60mg Zn/L, 50mg Cd/L + | - | Zn coadministration | - | No histology | No limitations identified |

|  |  |  |  |                                                                                        |  |  |  |  |  |
|--|--|--|--|----------------------------------------------------------------------------------------|--|--|--|--|--|
|  |  |  |  | 30mg Zn/L,<br>and 50mg<br>Cd/L +<br>60mg<br>Zn/L<br>groups) for<br>up to 12<br>months. |  |  |  |  |  |
|--|--|--|--|----------------------------------------------------------------------------------------|--|--|--|--|--|

\* AMPF: water solution of extract of polyphenols; ChE: chokeberry extract

Table S5. Details regarding sample size, histopathology staining techniques used in experimental case-control studies on different strains of animals to show oxidative stress histological and biomarkers changes induced by sodium fluoride on salivary glands

| Autor<br>Country<br>Referen<br>ce               | Type of<br>study<br>Model<br>considered                                                                                    | Sample size<br>(number,<br>drug) | If any controls<br>were considered | Dose and<br>route of<br>administrati<br>on                                                                                                                                                                                                                                                                                                                                               | Sacrifi<br>ced | How<br>were anti<br>oxidants<br>introduce<br>d | Different<br>groups<br>considered or<br>biopsied                                                                                             | Histopatholo<br>gy staining<br>technique | Observation<br>and<br>limitations                                                                                                                                                                                                                                                                                                                                                          |
|-------------------------------------------------|----------------------------------------------------------------------------------------------------------------------------|----------------------------------|------------------------------------|------------------------------------------------------------------------------------------------------------------------------------------------------------------------------------------------------------------------------------------------------------------------------------------------------------------------------------------------------------------------------------------|----------------|------------------------------------------------|----------------------------------------------------------------------------------------------------------------------------------------------|------------------------------------------|--------------------------------------------------------------------------------------------------------------------------------------------------------------------------------------------------------------------------------------------------------------------------------------------------------------------------------------------------------------------------------------------|
| dos<br>Santos et<br>al., 2022<br>Brazil<br>[10] | Experiment<br>al case-<br>control<br>Pregnant<br>Wistar rats<br>(Rattus<br>norvegicus)<br>aged 90<br>days (150–<br>200 g). | -                                | -                                  | Nine<br>pregnant<br>Wistar rats (n<br>= 3/group)<br>were<br>randomly<br>distributed<br>into three<br>experimental<br>groups: 0 mg<br>F/L (control<br>group—<br>deionized<br>water), 10<br>mg F/L, and<br>50 mg F/L<br>groups (after<br>sodium<br>fluoride<br>solubilizatio<br>n in<br>ultrapure<br>water). All<br>groups<br>received<br>water<br>with their<br>receptive<br>concentratio | -              | No<br>antioxida<br>nt                          | For this, after<br>perfusion, the<br>salivary<br>glands were<br>removed<br>and post-<br>fixed in 4%<br>formaldehyd<br>e until<br>processing. | HE<br>$\alpha$ -SMA,<br>CK-18            | Although<br>the present<br>study brings<br>unprecedent<br>ed data on<br>the effects of<br>indirect<br>exposure to<br>F on salivary<br>glands, an<br>important<br>limitation<br>deserves<br>comment, as<br>the period<br>that the<br>salivary<br>glands were<br>analyzed,<br>(i.e., 21 days<br>post-natal)<br>might not<br>have<br>allowed<br>a complete<br>maturation<br>of the<br>glands. |

|  |  |  |  |                                                                                                                                                                                                                                                                                                                                                                        |  |  |  |  |  |
|--|--|--|--|------------------------------------------------------------------------------------------------------------------------------------------------------------------------------------------------------------------------------------------------------------------------------------------------------------------------------------------------------------------------|--|--|--|--|--|
|  |  |  |  | ns of F and food under ad libitum conditions. Each pregnant rat generated approximately 10 offspring, comprising 30 offspring. Then, randomization was made to define 10 offspring per group. Only male animals were used in this study, and the remaining animals were used for another study. The experimental groups were conditioned to the exposure protocol with |  |  |  |  |  |
|--|--|--|--|------------------------------------------------------------------------------------------------------------------------------------------------------------------------------------------------------------------------------------------------------------------------------------------------------------------------------------------------------------------------|--|--|--|--|--|

|                               |                                                 |                                                               |                                                                                                     |                                                                                                                                                                                                                                                                                                                               |                |                                               |                                                                      |                                 |                           |
|-------------------------------|-------------------------------------------------|---------------------------------------------------------------|-----------------------------------------------------------------------------------------------------|-------------------------------------------------------------------------------------------------------------------------------------------------------------------------------------------------------------------------------------------------------------------------------------------------------------------------------|----------------|-----------------------------------------------|----------------------------------------------------------------------|---------------------------------|---------------------------|
|                               |                                                 |                                                               |                                                                                                     | <p>their respective concentrations for 42 days, out of which the first 21 days comprised the gestation period of the rats, and the following 21 days, the lactation period of the offspring. The doses used in this study 10 mg F/L and 50 mg F/L represent, respectively, 1–2 mg F/L and 5–10 mg F/L consumed by humans;</p> |                |                                               |                                                                      |                                 |                           |
| Lima et al., 2018 Brazil [28] | Experimental case-control group (n=20) were fed | Ninety-day-old male Wistar rats (240 g approximately; n = 40) | Animals in the MeHg group were fed with 0.04 mg/kg/day of MeHg in oil corn (n = 20) by intragastric | -                                                                                                                                                                                                                                                                                                                             | No antioxidant | Ten animals of each group were used to tissue | The parotid, submandibular, and sublingual glands were removed, post | HE $\alpha$ -SMA, CK-18 MT I/II | No limitations identified |

|                                  |                                              |                                                                                               |                                                                                                                                                                                                                                                                                                                                                                                                             |   |                |           |                                            |              |                           |
|----------------------------------|----------------------------------------------|-----------------------------------------------------------------------------------------------|-------------------------------------------------------------------------------------------------------------------------------------------------------------------------------------------------------------------------------------------------------------------------------------------------------------------------------------------------------------------------------------------------------------|---|----------------|-----------|--------------------------------------------|--------------|---------------------------|
|                                  | only with oil corn respecting the v/v ratio. |                                                                                               | gavage over 60 days                                                                                                                                                                                                                                                                                                                                                                                         |   |                | analysis. | fixed in 4% formaldehyde until processing. |              |                           |
| Yamaguti et al., 2013 Brazil [4] | Experimental case-control -                  | One hundred two-month-old male rats of Wistar strain were used in the present investigation . | Animals weighed between 220–270 g and, therefore, were randomly and equally ( $n = 50$ ) stratified into two groups according to the treatment received, fluoride (F) and control (C). Fluoride treatment groups were intraperitoneally administered with a single injection of NaF solution (15 mg F-/kg b.w.), and control rats received an equivalent dose of sodium chloride solution (0.9% NaCl). Each | - | No antioxidant | -         | -                                          | No histology | No limitations identified |



|  |  |  |                                                                                                                                                                                                                                                                                                                                                     |  |  |  |  |  |  |  |
|--|--|--|-----------------------------------------------------------------------------------------------------------------------------------------------------------------------------------------------------------------------------------------------------------------------------------------------------------------------------------------------------|--|--|--|--|--|--|--|
|  |  |  | <p>treatment group, F and C, was further divided into 5 subgroups according to the length of time after injection. The animals were euthanized 1, 3, 6, 12, and 24 h after injection, and SM and PA salivary glands were immediately excised, cleaned in isotonic solution, precooled in dry ice, and stored at -80°C until further processing.</p> |  |  |  |  |  |  |  |
|--|--|--|-----------------------------------------------------------------------------------------------------------------------------------------------------------------------------------------------------------------------------------------------------------------------------------------------------------------------------------------------------|--|--|--|--|--|--|--|

\*MT I/II - anti-metallothionein I/II

Table S6. Details regarding sample size, histopathology staining techniques used in experimental case-control studies on different strains of animals to show oxidative stress histological and biomarkers changes induced by antioxidants with restorative effects on salivary glands

| Autor<br>Country<br>Referen<br>ce           | Type of<br>study<br>Model<br>considere<br>d                               | Sample size<br>(number,<br>drug)                                      | If any<br>controls<br>were<br>consider<br>ed                | Dose and route<br>of<br>administration                                                                                                                                                                                                                                                                                                                                                                                      | Sacrificed                                                                                                                                                                                                                                                                                                                                                                                                                            | How were<br>anti oxidants<br>introduced                | Difference<br>nt<br>groups<br>consider<br>ed or<br>biopsied | Histopatho<br>logy<br>staining<br>technique | Observation<br>and<br>limitations                                                          |
|---------------------------------------------|---------------------------------------------------------------------------|-----------------------------------------------------------------------|-------------------------------------------------------------|-----------------------------------------------------------------------------------------------------------------------------------------------------------------------------------------------------------------------------------------------------------------------------------------------------------------------------------------------------------------------------------------------------------------------------|---------------------------------------------------------------------------------------------------------------------------------------------------------------------------------------------------------------------------------------------------------------------------------------------------------------------------------------------------------------------------------------------------------------------------------------|--------------------------------------------------------|-------------------------------------------------------------|---------------------------------------------|--------------------------------------------------------------------------------------------|
| Mostafa<br>et al.,<br>2023<br>Egypt<br>[15] | Experimental case-<br>control<br>study<br>Adult<br>male<br>albino<br>rats | G1:10,<br>control<br>G2: 10, HSP<br>G3: 10, CYP<br>G4: 10,<br>CYP+HSP | G1:<br>control:<br>normal<br>saline<br>for<br>seven<br>days | G1: HSP (100<br>mg/kg body<br>weight) daily<br>orally for seven<br>consecutive days<br>G2: CYP (200<br>mg/kg body<br>weight) single<br>intraperitoneal<br>injection on the<br>7th day<br>of the<br>experiment<br>G4: HSP (100<br>mg/kg body<br>weight) daily<br>orally for seven<br>consecutive days<br>and CYP (200<br>mg/kg body<br>weight) single<br>intraperitoneal<br>injection on the<br>7th day of the<br>experiment | all animals were<br>sacrificed;<br>parotid glands<br>were dissected<br>and weighed.<br>Then the<br>tissues were<br>distributed into<br>two parts. The<br>first one was<br>homogenized<br>and stored at – 80<br>°C for measuring<br>of<br>catalase activity,<br>the levels of<br>malondialdehyde<br>(MDA) and<br>glutathione<br>peroxidase<br>(GPx). The<br>second part was<br>prepared for<br>histopathology<br>and<br>immunohistoche | Pre-<br>administratio<br>n and<br>coadministrat<br>ion | G1<br>G2<br>G3<br>G4                                        | HE<br>Mallory<br>$\alpha$ -SMA<br>ki-67     | Salivary<br>gland<br>observation<br>only during<br>administratio<br>n with no<br>follow-up |

|                                         |                                                           |                                                            |                                                                              |                                                                                                                                                                                                                                                                                                                                                                                                                                                           |                                                                                                                                                                                                                                |                                        |                      |                                                                                             |                          |
|-----------------------------------------|-----------------------------------------------------------|------------------------------------------------------------|------------------------------------------------------------------------------|-----------------------------------------------------------------------------------------------------------------------------------------------------------------------------------------------------------------------------------------------------------------------------------------------------------------------------------------------------------------------------------------------------------------------------------------------------------|--------------------------------------------------------------------------------------------------------------------------------------------------------------------------------------------------------------------------------|----------------------------------------|----------------------|---------------------------------------------------------------------------------------------|--------------------------|
|                                         |                                                           |                                                            |                                                                              |                                                                                                                                                                                                                                                                                                                                                                                                                                                           | mistry.                                                                                                                                                                                                                        |                                        |                      |                                                                                             |                          |
| Alnuaimi et al., 2022<br>Iraq [12]      | Experimental case-control study<br>Adult male albino rats | G1: 6, control<br>G2: 6, Se<br>G3: 6, CYP<br>G4: 6, CYP+Se | C1: control: normal saline orally using oral needle gavage for fourteen days | G2: 0.2 mg /kg b.w. /day) of selenium orally that diluted in normal saline for fourteen days via oral needle gavage<br>G3: 150 mg/kg of b.w.) of cyclophosphamide (diluted in normal saline) injected intraperitoneally (i.p) on the 8th day.<br>G4: (0.2 mg /kg b.w. /day) of selenium orally for fourteen days, as well as, a single dose of (150mg/kg of b.w.) of cyclophosphamide diluted in normal saline were given on the day 8th of an experiment | At the end of the experiment, all rats in the four groups were anesthetized with an injection of ketamine and xylazine. Subsequently, submandibular salivary glands (SMG) were excised for histology and immunohistochemistry. | Preadministration and coadministration | G1<br>G2<br>G3<br>G4 | HE<br>Bcl-2<br>Positive and negative controls were run simultaneously with biopsy specimen, | No limitation identified |
| <b>Abdelzaher</b> et al., 2022<br>Egypt | Experimental case-control study                           | G1: 8, control<br>G2: 8, FEB<br>G3: 8, 5-FU                | G1: 8 control group, was                                                     | G2: 8 FEB (10 mg/kg) [18] once daily po for 14 days, dissolved                                                                                                                                                                                                                                                                                                                                                                                            | For histological and immunohistochemical tests, one                                                                                                                                                                            | Pre-administration                     | G1<br>G2<br>G3<br>G4 | HE<br>Toluidine-Blue<br>$\alpha$ -SMA                                                       | No limitation identified |

|                                  |                                                  |                                                                                          |                                                                                                                  |                                                                                                                                                                                                                                                               |                                                                                                                                                                                                |                  |                      |                           |                                                                                                                                                                                                           |
|----------------------------------|--------------------------------------------------|------------------------------------------------------------------------------------------|------------------------------------------------------------------------------------------------------------------|---------------------------------------------------------------------------------------------------------------------------------------------------------------------------------------------------------------------------------------------------------------|------------------------------------------------------------------------------------------------------------------------------------------------------------------------------------------------|------------------|----------------------|---------------------------|-----------------------------------------------------------------------------------------------------------------------------------------------------------------------------------------------------------|
| [16]                             | Male albino rats                                 | G4: 8, FEB+ 5-FU                                                                         | given only the vehicle for 14 days before receiving saline intravenous injections from the 10th to the 14th day. | in 0.5% carboxymethylcellulose sodium (CMC) G3: 8 5-FU (35 mg/kg/day) i.p from the 10th to 14th day G4: 8 pre-treated with 10 mg/kg FEB orally for two weeks before receiving 5-FU administration from the 10th to the 14th day.                              | gland from one side of each rat was excised                                                                                                                                                    |                  |                      |                           |                                                                                                                                                                                                           |
| Hassabou et al., 2021 Egypt [19] | Experimental case-control study Male albino rats | G1: 10, normal control (NC) G2: 10, tramadol G3: 10, 10-DHGD, G4: 10, tramadol + 10-DHGD | G1: normal control were fed plain chow, received no drugs and served as                                          | G2: tramadol intra peritoneal (20 mg /kg) body weight daily for 45 days. G3: received freshly extracted 10-DHGD, orally in a dose level (10 mg /kg) body weight and using 2% gum acacia as suspending agent for 45 days. G4: received tramadol and 10-DHGD in | At the end of the experiment, all the rats were scarified then dissected, submandibular salivary glands (SMGs) tissues were removed instantly, rinsed with ice cooled normal saline and dried. | coadministration | G1<br>G2<br>G3<br>G4 | HE<br>PAS<br>of caspase-3 | The present study aimed mainly to focus on histological alterations and apoptosis only of SMGs and dorsal tongue of experimental rats due to persistent tramadol intake. Despite the success demonstrated |

|                                    |                                                                |                 |                                                                                                                                  |                                                                                                                                                                                                                                                                   |   |                        |   |              |                                                                                                                                                                                               |
|------------------------------------|----------------------------------------------------------------|-----------------|----------------------------------------------------------------------------------------------------------------------------------|-------------------------------------------------------------------------------------------------------------------------------------------------------------------------------------------------------------------------------------------------------------------|---|------------------------|---|--------------|-----------------------------------------------------------------------------------------------------------------------------------------------------------------------------------------------|
|                                    |                                                                |                 |                                                                                                                                  | combination using the above mentioned doses.                                                                                                                                                                                                                      |   |                        |   |              | , there may be certain limitation in using extra parameters in concern to explain our proposal, however this will be taken in consideration during planning of further studies in the future. |
| Dąbrowska et al., 2019 Poland [27] | Experimental case-control 96 young (3-4-weekold) female Wistar | G1: 16, control | G1: control, throughout the experiment (3 or 10 months), the rats received purified water and standard fodder (Labofeed, Kcynia) | Group 2—AMPF: the rats received only a 0.1% water solution of extract of polyphenols (AMPF) for drinking for 3 or 10 months and standard fodder<br>Group 3—Cd1: the rats were exposed to cadmium (as CdCl <sub>2</sub> ) in the fodder, receiving 1mg Cd/kg for 3 | - | APMF Co-administration | - | No histology | No limitation identified                                                                                                                                                                      |

|  |  |  |  |                                                                                                                                                                                                                                                                                                                                                                                                                                                                                                                                                                                                                                                      |  |  |  |  |  |  |
|--|--|--|--|------------------------------------------------------------------------------------------------------------------------------------------------------------------------------------------------------------------------------------------------------------------------------------------------------------------------------------------------------------------------------------------------------------------------------------------------------------------------------------------------------------------------------------------------------------------------------------------------------------------------------------------------------|--|--|--|--|--|--|
|  |  |  |  | <p>or<br/>10 months, and<br/>received purified<br/>water for<br/>drinking<br/>Group 4—Cd1 +<br/>AMPF:<br/>throughout the<br/>period (3<br/>or 10 months) of<br/>exposure to 1mg<br/>of Cd/kg, the rats<br/>received the 0.1%<br/>water solution of<br/>extract of<br/>polyphenols<br/>from black<br/>chokeberry fruit<br/>Group 5—Cd5:<br/>the rats received<br/>fodder<br/>containing 5mg<br/>Cd/kg for 3 or 10<br/>months and<br/>purified water<br/>for drinking<br/>Group 6—Cd5 +<br/>AMPF: during<br/>exposure (for 3<br/>or 10 months) to<br/>5mg Cd/kg of<br/>fodder, the rats<br/>received<br/>0.1% water<br/>solution of<br/>extract of</p> |  |  |  |  |  |  |
|--|--|--|--|------------------------------------------------------------------------------------------------------------------------------------------------------------------------------------------------------------------------------------------------------------------------------------------------------------------------------------------------------------------------------------------------------------------------------------------------------------------------------------------------------------------------------------------------------------------------------------------------------------------------------------------------------|--|--|--|--|--|--|

|                                              |                                                    |                                               |   |                                                                                                                                                                                                                                                                                                                                 |                                                                                                                                                                                                                                                                                                                                                                                                                                                               |                      |   |              |                                                                                                                                                                                                                                                                                                                                                                                |
|----------------------------------------------|----------------------------------------------------|-----------------------------------------------|---|---------------------------------------------------------------------------------------------------------------------------------------------------------------------------------------------------------------------------------------------------------------------------------------------------------------------------------|---------------------------------------------------------------------------------------------------------------------------------------------------------------------------------------------------------------------------------------------------------------------------------------------------------------------------------------------------------------------------------------------------------------------------------------------------------------|----------------------|---|--------------|--------------------------------------------------------------------------------------------------------------------------------------------------------------------------------------------------------------------------------------------------------------------------------------------------------------------------------------------------------------------------------|
|                                              |                                                    |                                               |   | polyphenols from black chokeberry fruit for drinking                                                                                                                                                                                                                                                                            |                                                                                                                                                                                                                                                                                                                                                                                                                                                               |                      |   |              |                                                                                                                                                                                                                                                                                                                                                                                |
| Onopiu<br>k et al.,<br>2021<br>Poland<br>[2] | Experimental case-control<br>96 female Wistar rats | G1: 16, control<br>G2<br>G3<br>G4<br>G5<br>G6 | - | (control group and ChE group) or containing cadmium (Cd1 group, Cd5 group, Cd1+ChE group, and Cd5+ChE group) and drinking fluid—unpolluted water (control group, Cd1 group, and Cd5 group) or 0.1% aqueous ChE (ChE group, Cd1+ChE group, and Cd5+ChE group). The 0.1% ChE was prepared from the powdered A. metacarpal extract | After 3 and 10 months of the experiment, the right and left sublingual salivary glands were collected under general anesthesia with barbiturate (intraperitoneal administration of Morbital in a dose of 30 mg/kg b.w.), immediately after animals were sacrificed. For this purpose, the common sublingual and submandibular connective tissue capsule, covering both salivary glands, was removed, and the right and left sublingual glands (the sublingual | ChE coadministration | - | No histology | The next limitation is the small weight of the sublingual salivary glands, which made it impossible to perform a wider range of studies, including determination of indices of oxidative modifications of nucleic acids and evaluation of the microscopic structure of the salivary gland tissue. Another limitations of the study are the impossibility of explanation of the |

|  |  |  |  |  |                                                                                                                     |  |  |  |                                                                                                                                                                                                                                                                                                                                                                                                                                |
|--|--|--|--|--|---------------------------------------------------------------------------------------------------------------------|--|--|--|--------------------------------------------------------------------------------------------------------------------------------------------------------------------------------------------------------------------------------------------------------------------------------------------------------------------------------------------------------------------------------------------------------------------------------|
|  |  |  |  |  | glands are paired salivary glands of the same structure and function) were separated from the submandibular glands. |  |  |  | molecular pathways of the preventive action of ChE with respect to the oxidative stress and oxidative modifications of proteins and lipids induced by cadmium in the sublingual salivary gland, as well as whether the changes in the balance between the processes of oxidation and reduction in this salivary gland noted due to the administration of cadmium or/and ChE might be the outcome or the cause of the impact on |
|--|--|--|--|--|---------------------------------------------------------------------------------------------------------------------|--|--|--|--------------------------------------------------------------------------------------------------------------------------------------------------------------------------------------------------------------------------------------------------------------------------------------------------------------------------------------------------------------------------------------------------------------------------------|



|                                          |                                                     |                                                                                                                                                              |                                                                     |                                                                                                                                                                                                                                                          |   |                     |   |              |                                                                                                                                                                                                                            |
|------------------------------------------|-----------------------------------------------------|--------------------------------------------------------------------------------------------------------------------------------------------------------------|---------------------------------------------------------------------|----------------------------------------------------------------------------------------------------------------------------------------------------------------------------------------------------------------------------------------------------------|---|---------------------|---|--------------|----------------------------------------------------------------------------------------------------------------------------------------------------------------------------------------------------------------------------|
|                                          |                                                     |                                                                                                                                                              |                                                                     |                                                                                                                                                                                                                                                          |   |                     |   |              | the salivary glands' secretory function or saliva composition. In the available literature, we have found no data on the relationship between salivary glands' oxidative/reductive status and the saliva secreted by them. |
| Kostecka-Sochoń et al., 2018 Poland [26] | Experimental case-control 72 adult male Wistar rats | 9 groups, and in each group was 8 animals. In research, 2 groups received Zn alone, 2 groups were treated with Cd alone, and 4 groups received Zn supplement | The control groups received drinking water without cadmium or zinc. | Zn and Cd were administered in drinking water at the concentrations of 30 or 60mg Zn/L (as ZnCl <sub>2</sub> ; Merck) and 5 or 50mg Cd/L (as CdCl <sub>2</sub> ·2 1/2H <sub>2</sub> O; POCH; Gliwice, Poland) alone (30mg Zn/L, 60mg Zn/L, 5mg Cd/L, and | - | Zn coadministration | - | No histology | No limitations identified                                                                                                                                                                                                  |

|                                                   |                             |                                                    |   |                                                                                                                                                                                                                                                                                                                                                            |                                                                                                                                                                                                                                                          |                                                   |   |                                                                                                                                                                                                                           |                          |
|---------------------------------------------------|-----------------------------|----------------------------------------------------|---|------------------------------------------------------------------------------------------------------------------------------------------------------------------------------------------------------------------------------------------------------------------------------------------------------------------------------------------------------------|----------------------------------------------------------------------------------------------------------------------------------------------------------------------------------------------------------------------------------------------------------|---------------------------------------------------|---|---------------------------------------------------------------------------------------------------------------------------------------------------------------------------------------------------------------------------|--------------------------|
|                                                   |                             | ation during exposure to Cd.                       |   | 50mg Cd/L groups) and in combination (5mg Cd/L + 30mg Zn/L, 5mg Cd/L + 60mg Zn/L, 50mg Cd/L + 30mg Zn/L, and 50mg Cd/L + 60mg Zn/L groups) for up to 12 months.                                                                                                                                                                                            |                                                                                                                                                                                                                                                          |                                                   |   |                                                                                                                                                                                                                           |                          |
| Elsherbi ni et al., 2020 Saudi Arabia, Egypt [31] | Experimental case-control - | Thirty male Sprague Dawley rats weighing 100–150 g | - | 3 groups. (1) Control group received phosphate buffer solution. (2) Sodium nitrite-treated (SN) group, rats were treated with (80 mg/kg) SN dissolved in distilled water (Sigma Aldrich, St Louis, MO, USA) (3, 8). (3) Glycyrrhizic acid (GA) treated group, rats were given 15 mg/kg GA, dissolved in distilled water (Sigma-Aldrich, St Louis, MO, USA) | All rats were anesthetized then euthanized by overdose of halothane.20 Both SMG and lung specimens were collected and processed for further analysis. The sublingual gland was separated from submandibular, sublingual gland complex before processing. | Glycyrrhizic acid (GA) treated group pretreatment | - | The right halves of specimens were fixed, processed into 5 mm paraffin sections, and stained with Hematoxylin and Eosin (H&E),21 Masson's Trichrome (MTC) stain to detect collagen fibers, and Periodic Acid Schiff (PAS) | No limitation identified |

|  |  |  |  |                                                                                                                 |  |  |  |                       |  |
|--|--|--|--|-----------------------------------------------------------------------------------------------------------------|--|--|--|-----------------------|--|
|  |  |  |  | followed by SN<br>(80 mg/kg).<br>All treatment<br>modalities<br>were given orally<br>and daily for 3<br>months. |  |  |  | CD68<br>$\alpha$ -SMA |  |
|--|--|--|--|-----------------------------------------------------------------------------------------------------------------|--|--|--|-----------------------|--|
